# Supplementary material for: Etiology of Clinical Community-Acquired Pneumonia in Swedish Children Aged 1–59 Months with High Pneumococcal Vaccine Coverage—The TREND Study
Source: MDPI journal article supplement (doi:10.3390/vaccines9040384), 2021-04-14
Supplement: s1 [file s1]

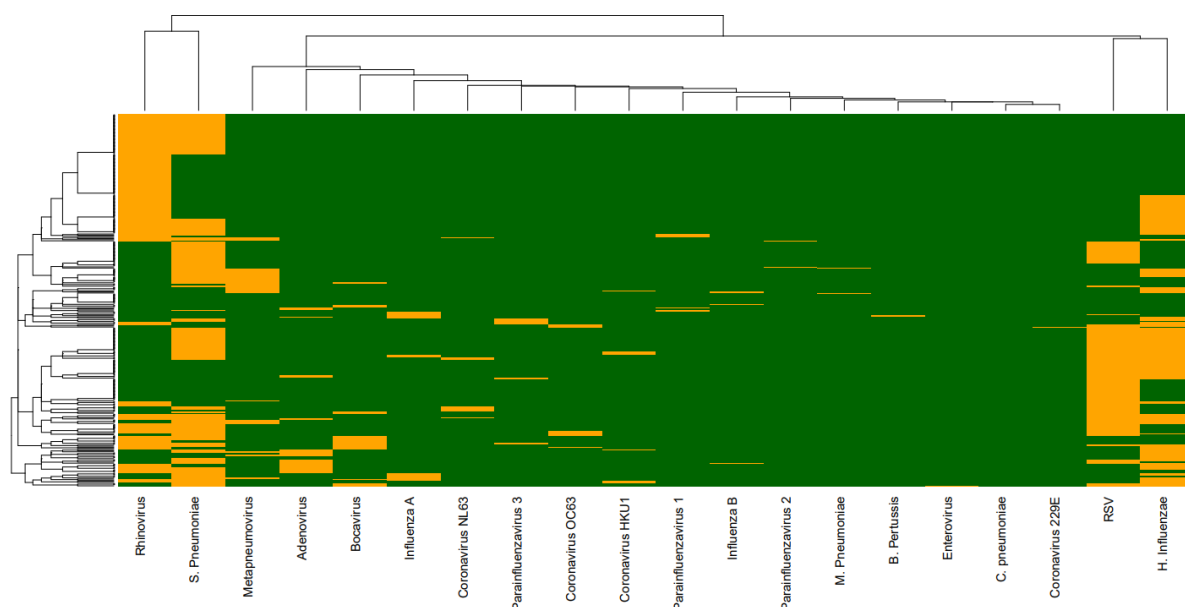

**Figure S1 – Heatmap of respiratory real-time PCR-findings in children aged 1-59 months with clinical CAP**

Euclidean hierarchical clustering of 327 patient cases (vertical axis) versus 20 PCR-tested pathogens (horizontal axis). An orange cell indicates a positive PCR test for a patient. For instance, in the top segment of rows, patients simultaneously positive for rhinovirus and *S. pneumoniae* are seen. The cluster map illustrates patterns of coinfections in groups of patients, as well as groups of frequently co-occurring pathogens, such as rhinovirus+*S. pneumoniae* (left) and RSV+*H. influenzae* (right).

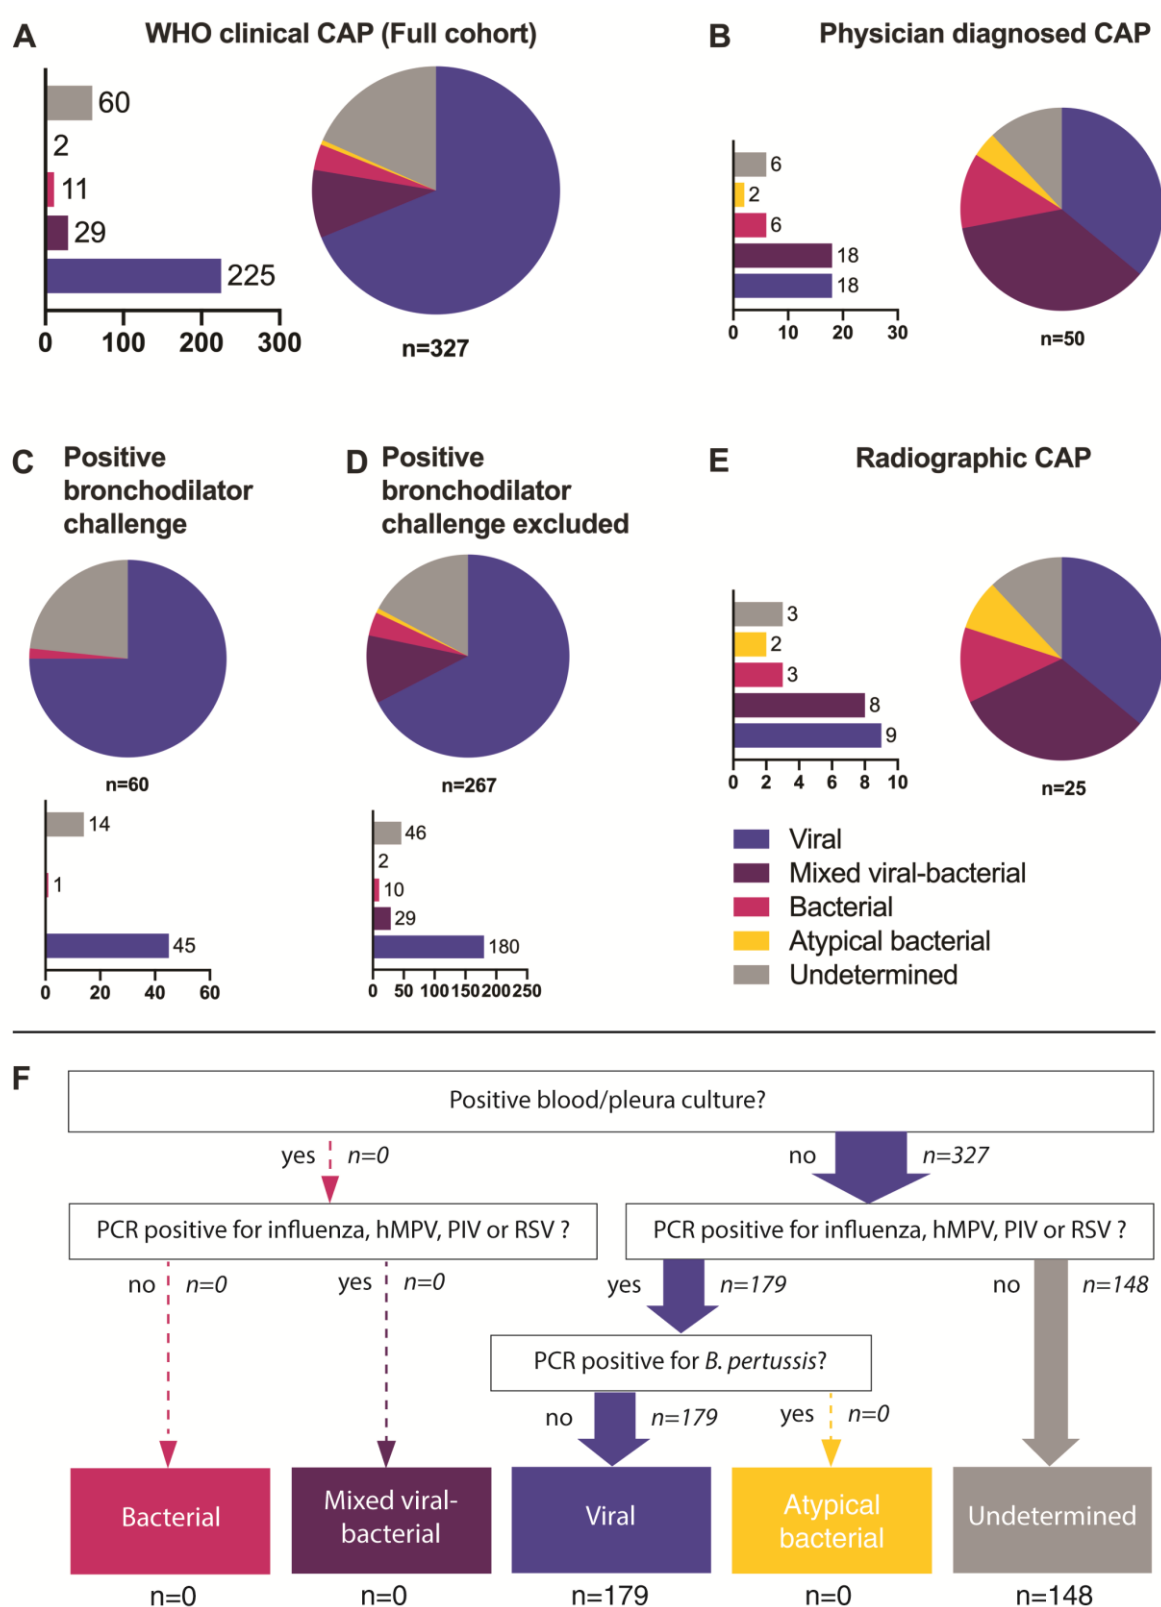

Figure S2. Etiology of children aged 1-59 months with clinical CAP in the TREND study varying the etiology algorithm. Etiology using CRP cutoff 60 mg/L for definition of bacterial etiology A) in the full cohort ( $n=327$ ), B) in children with physician-diagnosed CAP (ICD-10 code of J10.0, J11.0 or J12-J18) ( $n=50$ ), C) in children with ( $n=60$ ) or D) without ( $n=268$ ) positive bronchodilator challenge and E) in children with radiographic CAP ( $n=25$ ). F) Etiology according to the strict TREND algorithm based on microbiologically confirmed diagnosis in the full cohort ( $n=328$ ). Abbreviations: CAP, community-acquired pneumonia; WHO, world health organization.

Table S1. Characteristics of children responding to bronchodilator challenge

| Characteristic                    | Children responding to bronchodilator challenge<br>(n=60) | Children not responding to bronchodilator challenge<br>(n=79) | Children not receiving/not eligible for bronchodilator challenge<br>(n=188) | p-value |
|-----------------------------------|-----------------------------------------------------------|---------------------------------------------------------------|-----------------------------------------------------------------------------|---------|
| Age (months), median IQR          | 17 (10-26)                                                | 14 (7-23)                                                     | 11 (3-20)                                                                   | <0.001  |
| Male sex                          | 34 (57)                                                   | 52 (66)                                                       | 114 (61)                                                                    | 0.53    |
| Attending pre-school              | 30 (52)                                                   | 30 (38)                                                       | 75 (41)                                                                     | 0.25    |
| Breastfeeding                     | 11 (19)                                                   | 24 (30)                                                       | 71 (38)                                                                     | 0.02    |
| Parental smoking                  | 9 (16)                                                    | 13 (16)                                                       | 23 (12)                                                                     | 0.62    |
| Chronic disease                   | 32 (56)                                                   | 32 (41)                                                       | 43 (24)                                                                     | <0.001  |
| <i>Asthma</i>                     | 31 (54)                                                   | 29 (37)                                                       | 31 (17)                                                                     |         |
| <i>Other</i>                      | 1 (2)                                                     | 3 (4)                                                         | 12 (7)                                                                      |         |
| University studies ≥1 parent      | 42 (70)                                                   | 65 (82)                                                       | 140 (74)                                                                    | 0.22    |
| Clinical presentation             |                                                           |                                                               |                                                                             |         |
| Tachypnea <sup>c</sup>            | 56 (93)                                                   | 70 (89)                                                       | 165 (88)                                                                    | 0.53    |
| Cough                             | 58 (98)                                                   | 79 (100)                                                      | 176 (97)                                                                    | 0.32    |
| Breathing troubles                | 44 (86)                                                   | 58 (84)                                                       | 120 (75)                                                                    | 0.11    |
| History of fever                  | 47 (85)                                                   | 55 (77)                                                       | 145 (80)                                                                    | 0.52    |
| Peripheral oxygen saturation <90% | -                                                         | 9 (12)                                                        | 16 (9)                                                                      | 0.01    |
| Nasal flaring                     | 8 (13)                                                    | 9 (12)                                                        | 14 (8)                                                                      | 0.28    |
| Grunting                          | 2 (3)                                                     | 9 (12)                                                        | 11 (6)                                                                      | 0.13    |
| CRP mg/L median (IQR)             | 10 (0-24)                                                 | 13 (0-24)                                                     | 15 (0-46)                                                                   | 0.18    |
| PCR findings                      |                                                           |                                                               |                                                                             |         |
| Adenovirus                        | 1 (2)                                                     | 5 (6)                                                         | 18 (10)                                                                     | 0.11    |
| Bocavirus                         | 4 (7)                                                     | 8 (10)                                                        | 9 (5)                                                                       | 0.28    |
| Coronavirus (any)                 | 6 (10)                                                    | 4 (5)                                                         | 14 (7)                                                                      | 0.56    |
| Enterovirus                       | -                                                         | -                                                             | 1 (1)                                                                       | 1.0     |
| Influenza virus (any)             | 2 (3)                                                     | 1 (1)                                                         | 15 (8)                                                                      | 0.06    |
| Metapneumovirus                   | 7 (12)                                                    | 4 (5)                                                         | 21 (11)                                                                     | 0.26    |
| Parainfluenza virus               | 3 (5)                                                     | 6 (8)                                                         | 7 (4)                                                                       | 0.36    |
| RSV                               | 18 (30)                                                   | 28 (35)                                                       | 80 (43)                                                                     | 0.18    |
| Rhinovirus                        | 37 (62)                                                   | 45 (57)                                                       | 74 (39)                                                                     | <0.01   |
| <i>B. pertussis</i>               | -                                                         | -                                                             | 1 (1)                                                                       | 1.0     |
| <i>H. influenzae</i>              | 26 (43)                                                   | 28 (35)                                                       | 89 (47)                                                                     | 0.20    |
| <i>M. pneumoniae</i>              | -                                                         | -                                                             | 2 (1)                                                                       | 1.0     |
| <i>S. pneumoniae</i>              | 34 (57)                                                   | 37 (47)                                                       | 108 (57)                                                                    | 0.27    |

<sup>a</sup> Age-adjusted (>50 breaths/min in children <1 year, >40 breaths/min in children 1-4 years). Abbreviations: IQR, interquartile range.

Table S2 - Coinfections. Total PCR-positive infections in the cohort were dominated by *S. pneumoniae*, Rhinovirus, *H. influenzae* and RSV. There were relatively few single infections, with the exception of 36 patients presenting with only Rhinovirus positivity. *S. pneumoniae*, Rhinovirus, *H. influenzae* and RSV also dominated among coinfections, with *S. pneumoniae*+*H. influenzae* (83), *S. pneumoniae*+Rhinovirus (83), *S. pneumoniae*+RSV (79), *H. influenzae* + RSV (66) and *H. influenzae* + Rhinovirus (59) being the most common pairwise coinfections.

| Group                | Adenovirus | Bocavirus | Coronavirus 229E | Coronavirus HKU1 | Coronavirus NL63 | Coronavirus OC63 | Enterovirus | <i>H. influenzae</i> | Influenza B | Influenza A | Metapneumovirus | <i>M. pneumoniae</i> | Parainfluenzavirus 1 | Parainfluenzavirus 2 | Parainfluenzavirus 3 | <i>B. pertussis</i> | <i>S. pneumoniae</i> | Rhinovirus | RSV | <i>C. pneumoniae</i> |
|----------------------|------------|-----------|------------------|------------------|------------------|------------------|-------------|----------------------|-------------|-------------|-----------------|----------------------|----------------------|----------------------|----------------------|---------------------|----------------------|------------|-----|----------------------|
| Total infections     | 24         | 21        | 1                | 7                | 9                | 8                | 1           | 144                  | 3           | 15          | 32              | 2                    | 6                    | 2                    | 8                    | 1                   | 179                  | 156        | 127 | 0                    |
| Single infections    | 1          | 2         | 0                | 0                | 0                | 0                | 0           | 2                    | 1           | 2           | 2               | 1                    | 1                    | 0                    | 0                    | 0                   | 3                    | 36         | 19  | 0                    |
| Coinfections         | 23         | 19        | 1                | 7                | 9                | 8                | 1           | 142                  | 2           | 13          | 30              | 1                    | 5                    | 2                    | 8                    | 1                   | 176                  | 120        | 108 | 0                    |
| Adenovirus           |            |           |                  |                  |                  |                  |             |                      |             |             |                 |                      |                      |                      |                      |                     |                      |            |     |                      |
| Bocavirus            | 0          |           |                  |                  |                  |                  |             |                      |             |             |                 |                      |                      |                      |                      |                     |                      |            |     |                      |
| Coronavirus 229E     | 0          | 0         |                  |                  |                  |                  |             |                      |             |             |                 |                      |                      |                      |                      |                     |                      |            |     |                      |
| Coronavirus HKU1     | 1          | 0         | 0                |                  |                  |                  |             |                      |             |             |                 |                      |                      |                      |                      |                     |                      |            |     |                      |
| Coronavirus NL63     | 0          | 0         | 0                | 0                |                  |                  |             |                      |             |             |                 |                      |                      |                      |                      |                     |                      |            |     |                      |
| Coronavirus OC63     | 0          | 1         | 1                | 0                | 0                |                  |             |                      |             |             |                 |                      |                      |                      |                      |                     |                      |            |     |                      |
| Enterovirus          | 0          | 1         | 0                | 0                | 0                | 0                |             |                      |             |             |                 |                      |                      |                      |                      |                     |                      |            |     |                      |
| <i>H. influenzae</i> | 18         | 8         | 0                | 7                | 3                | 4                | 1           |                      |             |             |                 |                      |                      |                      |                      |                     |                      |            |     |                      |
| Influenza B          | 1          | 0         | 0                | 0                | 0                | 0                | 0           | 2                    |             |             |                 |                      |                      |                      |                      |                     |                      |            |     |                      |
| Influenza A          | 1          | 1         | 0                | 0                | 0                | 0                | 0           | 9                    | 0           |             |                 |                      |                      |                      |                      |                     |                      |            |     |                      |
| Metapneumovirus      | 2          | 1         | 0                | 1                | 1                | 0                | 0           | 20                   | 1           | 1           |                 |                      |                      |                      |                      |                     |                      |            |     |                      |
| <i>M. pneumoniae</i> | 0          | 0         | 0                | 0                | 0                | 0                | 0           | 0                    | 0           | 0           | 0               |                      |                      |                      |                      |                     |                      |            |     |                      |
| Parainfluenzavirus 1 | 1          | 0         | 0                | 0                | 0                | 0                | 0           | 1                    | 0           | 0           | 0               | 0                    |                      |                      |                      |                     |                      |            |     |                      |
| Parainfluenzavirus 2 | 0          | 0         | 0                | 0                | 0                | 0                | 0           | 0                    | 0           | 0           | 0               | 0                    | 0                    |                      |                      |                     |                      |            |     |                      |
| Parainfluenzavirus 3 | 0          | 2         | 0                | 0                | 0                | 0                | 0           | 5                    | 0           | 0           | 0               | 0                    | 0                    | 0                    |                      |                     |                      |            |     |                      |
| <i>B. pertussis</i>  | 0          | 0         | 0                | 0                | 0                | 0                | 0           | 0                    | 0           | 1           | 0               | 0                    | 0                    | 0                    | 0                    |                     |                      |            |     |                      |
| <i>S. pneumoniae</i> | 13         | 14        | 0                | 6                | 7                | 4                | 1           | 83                   | 1           | 9           | 23              | 1                    | 3                    | 1                    | 5                    | 0                   |                      |            |     |                      |
| Rhinovirus           | 9          | 13        | 0                | 1                | 2                | 4                | 0           | 59                   | 0           | 2           | 4               | 0                    | 3                    | 1                    | 4                    | 0                   | 83                   |            |     |                      |
| RSV                  | 7          | 6         | 1                | 3                | 8                | 7                | 1           | 66                   | 1           | 3           | 6               | 0                    | 0                    | 0                    | 1                    | 0                   | 79                   | 20         |     |                      |
| <i>C. pneumoniae</i> | 0          | 0         | 0                | 0                | 0                | 0                | 0           | 0                    | 0           | 0           | 0               | 0                    | 0                    | 0                    | 0                    | 0                   | 0                    | 0          | 0   |                      |
